# Supplementary material for: Theoretical study of the formation of metal–oxo species of the first transition series with the ligand 14-TMC: driving factors of the “Oxo Wall”
Source: Royal Society of Chemistry journal article supplement (doi:10.1039/d3dt02109b), 2023-01-01
Supplement: d3dt02109b1.pdf [file d3dt02109b1.pdf]

## **Theoretical Study for Formation of Metal-oxo of First Transition Series with 14-TMC Ligand: Drives for “Oxo Wall”**

Monika\*<sup>a</sup>, Manjeet Kumar<sup>a</sup>, Somi<sup>a</sup>, Arup Sarkar<sup>b</sup>, Manoj Kumar Gupta<sup>a</sup> and Azaj Ansari\*<sup>a</sup>

Email: [monika.raoji@gmail.com](mailto:monika.raoji@gmail.com) and [ajaz.alam2@gmail.com](mailto:ajaz.alam2@gmail.com)

<sup>a</sup>*Department of Chemistry, Central University of Haryana, Mahendergarh, Haryana-123031, India.*

<sup>b</sup>*Department of Chemistry, The University of Chicago 5735 South Ellis Avenue, Chicago, IL 60637*

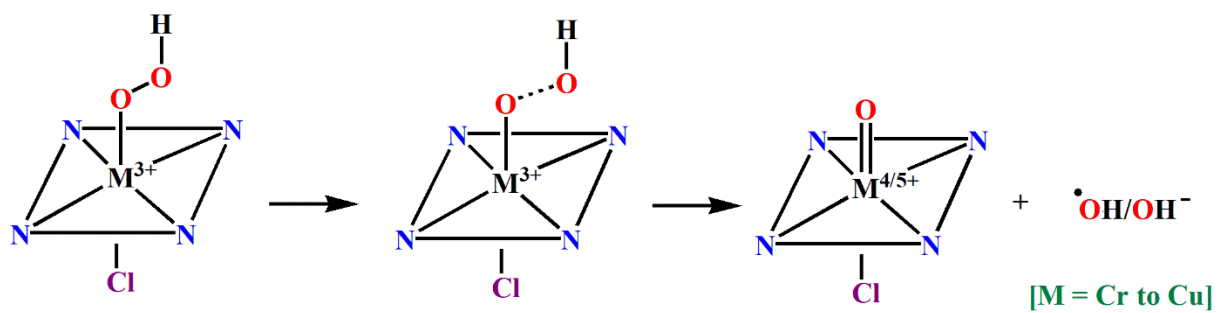

**Scheme S1.** Proposed mechanism for the formation of metal-oxo species.

**Table S1.** B3LYP-D2 computed relative energies in kJ/mol.

| Spin states                        | Energy (kJ/mol) | Spin states                        | Energy (kJ/mol) |
|------------------------------------|-----------------|------------------------------------|-----------------|
| [(14-TMC)(Cl)CrOOH] <sup>+</sup>   |                 | [(14-TMC)(Cl)MnOOH] <sup>+</sup>   |                 |
| <sup>4</sup> Cr <sub>hs</sub>      | 0.0             | <sup>5</sup> Mn <sub>hs</sub>      | 0.0             |
| <sup>2</sup> Cr <sub>ls</sub>      | 157.0           | <sup>3</sup> Mn <sub>is</sub>      | 46.8            |
|                                    |                 | <sup>1</sup> Mn <sub>ls</sub>      | 144.8           |
| <sup>4</sup> Cr <sub>hs</sub> -ts  | 74.8            | <sup>5</sup> Mn <sub>hs</sub> -ts  | 66.3            |
| <sup>2</sup> Cr <sub>ls</sub> -ts  | 150.5           | <sup>3</sup> Mn <sub>is</sub> -ts  | 76.5            |
| <sup>3</sup> Cr <sub>hs</sub> -Int | 47.7            | <sup>4</sup> Mn <sub>hs</sub> -Int | 33.2            |
| <sup>1</sup> Cr <sub>ls</sub> -Int | 90.2            | <sup>2</sup> Mn <sub>ls</sub> -Int | 91.1            |
| [(14-TMC)(Cl)FeOOH] <sup>+</sup>   |                 | [(14-TMC)(Cl)CoOOH] <sup>+</sup>   |                 |
| <sup>6</sup> Fe <sub>hs</sub>      | 0.0             | <sup>5</sup> Co <sub>hs</sub>      | 35.5            |
| <sup>4</sup> Fe <sub>is</sub>      | 100.8           | <sup>3</sup> Co <sub>is</sub>      | 25.8            |
| <sup>2</sup> Fe <sub>ls</sub>      | 34.8            | <sup>1</sup> Co <sub>ls</sub>      | 0.0             |
| <sup>6</sup> Fe <sub>hs</sub> -ts  | 73.2            | <sup>5</sup> Co <sub>hs</sub> -ts  | 99.8            |
| <sup>4</sup> Fe <sub>is</sub> -ts  | 94.3            |                                    |                 |
| <sup>2</sup> Fe <sub>ls</sub> -ts  | 83.8            |                                    |                 |
| <sup>5</sup> Fe <sub>hs</sub> -Int | 47.2            | <sup>6</sup> Co <sub>hs</sub> -Int | 142.7           |
| <sup>3</sup> Fe <sub>is</sub> -Int | 47.8            | <sup>4</sup> Co <sub>is</sub> -Int | 61.4            |
| <sup>1</sup> Fe <sub>ls</sub> -Int | 168.5           | <sup>2</sup> Co <sub>ls</sub> -Int | 71.5            |
| [(14-TMC)(Cl)NiOOH] <sup>+</sup>   |                 | [(14-TMC)(Cl)CuOOH] <sup>+</sup>   |                 |
| <sup>4</sup> Ni <sub>hs</sub>      | -               | <sup>3</sup> Cu <sub>hs</sub>      | 0.0             |
| <sup>2</sup> Ni <sub>ls</sub>      | 0.0             | <sup>1</sup> Cu <sub>ls</sub>      | 79.1            |
| <sup>4</sup> Ni <sub>hs</sub> -ts  | 105.0           | <sup>3</sup> Cu <sub>hs</sub> -ts  | 153.5           |
| <sup>5</sup> Ni <sub>hs</sub> -Int | 174.0           | <sup>4</sup> Cu <sub>hs</sub> -Int | 124.9           |
| <sup>3</sup> Ni <sub>is</sub> -Int | 246.6           | <sup>2</sup> Cu <sub>ls</sub> -Int | 155.5           |
| <sup>1</sup> Ni <sub>ls</sub> -Int | -               |                                    |                 |

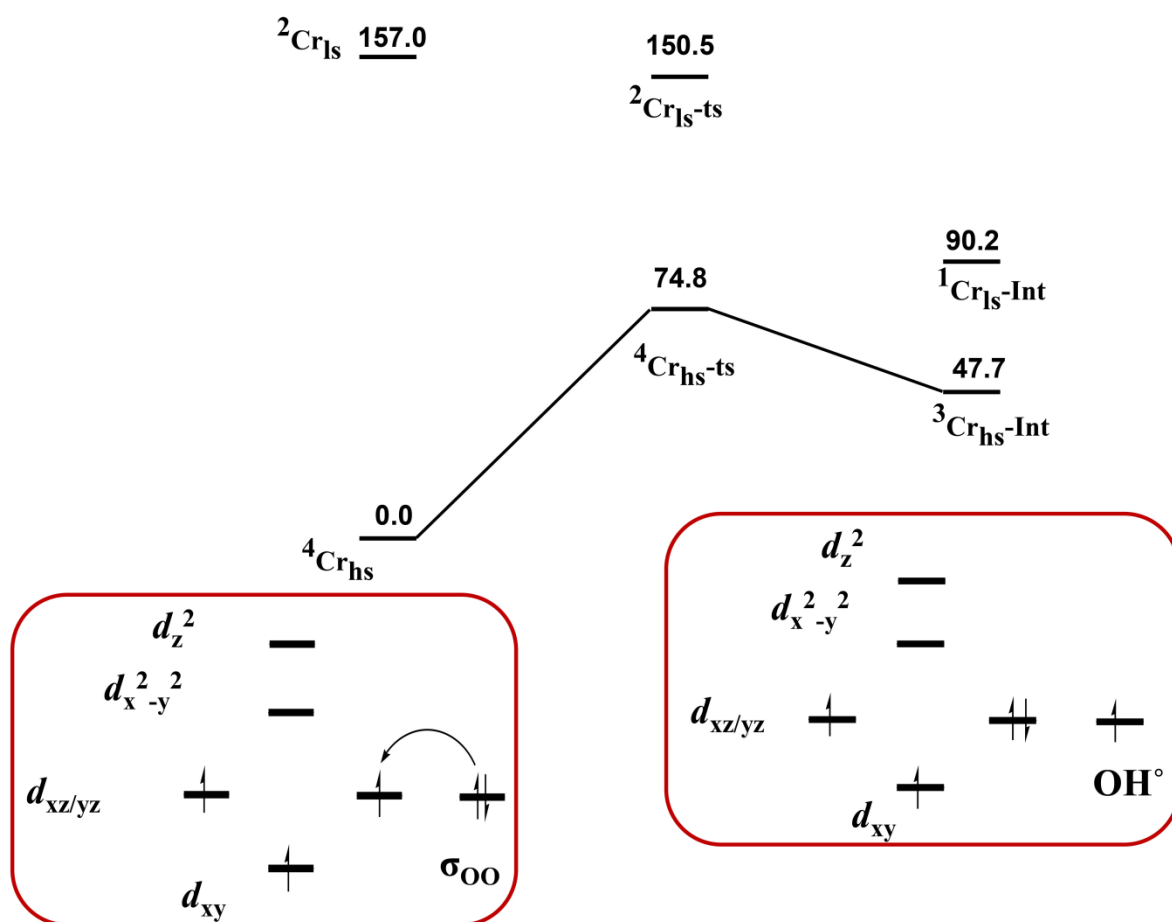

Figure S1. B3LYP-D2 computed energy surface ( $\Delta G$  in  $\text{kJ mol}^{-1}$ ) for the O---O bond cleavage of chromium(III) hydroperoxo species.

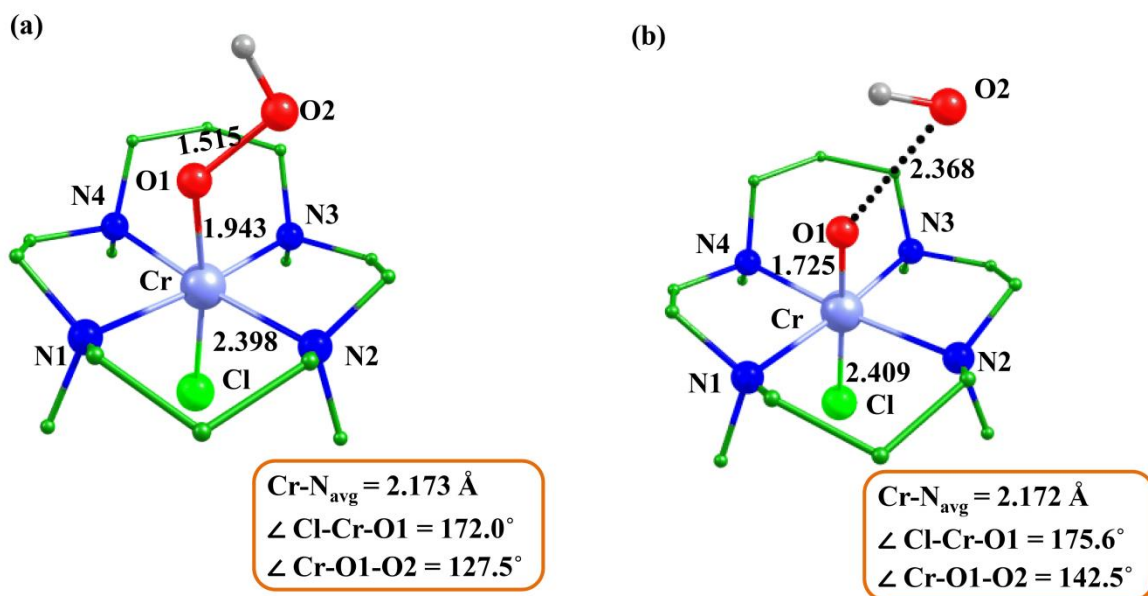

Figure S2. B3LYP-D2 a) optimized structure of the ground state of chromium hydroperoxo ( $^4\text{Cr}_{\text{hs}}$ ); (b) optimized structure of the ground state of transition state  $^4\text{Cr}_{\text{hs-ts}}$  (bond lengths are in Å).

**Table S2.** B3LYP-D2 computed selected structural parameters of the 14-TMC metal hydroperoxo species, transition states (O---O) and metal-oxo.

| Spin State                         | Bond length (Å) |                  |                  |                  |                  |         | Bond Angel (°) |       |        |       |       |                                  |                                  |
|------------------------------------|-----------------|------------------|------------------|------------------|------------------|---------|----------------|-------|--------|-------|-------|----------------------------------|----------------------------------|
|                                    | M-O             | M-N <sub>1</sub> | M-N <sub>2</sub> | M-N <sub>3</sub> | M-N <sub>4</sub> | M-N avg | M-Cl           | O-O   | Cl-M-O | M-O-O | O-O-H | N <sub>1</sub> -M-N <sub>3</sub> | N <sub>2</sub> -M-N <sub>4</sub> |
| [(14-TMC)(Cl)CrOOH] <sup>+</sup>   |                 |                  |                  |                  |                  |         |                |       |        |       |       |                                  |                                  |
| <sup>4</sup> Cr <sub>hs</sub>      | 1.943           | 2.147            | 2.183            | 2.196            | 2.161            | 2.173   | 2.398          | 1.515 | 172.0  | 127.5 | 99.7  | 175.0                            | 174.6                            |
| <sup>2</sup> Cr <sub>ls</sub>      | 1.894           | 2.161            | 2.146            | 2.185            | 2.197            | 2.171   | 2.386          | 1.518 | 171.9  | 129.2 | 99.6  | 175.3                            | 174.9                            |
| <sup>4</sup> Cr <sub>hs</sub> -ts  | 1.725           | 2.189            | 2.159            | 2.164            | 2.175            | 2.172   | 2.409          | 2.368 | 175.6  | 142.5 | 68.9  | 174.8                            | 174.8                            |
| <sup>2</sup> Cr <sub>ls</sub> -ts  | 1.686           | 2.205            | 2.163            | 2.138            | 2.188            | 2.173   | 2.389          | 1.878 | 172.8  | 137.0 | 89.9  | 176.6                            | 175.8                            |
| <sup>3</sup> Cr <sub>hs</sub> -Int | 1.715           | 2.167            | 2.167            | 2.176            | 2.176            | 2.171   | 2.419          | -     | 176.8  | -     | -     | 174.5                            | 174.5                            |
| <sup>1</sup> Cr <sub>ls</sub> -Int | 1.580           | 2.182            | 2.181            | 2.175            | 2.175            | 2.178   | 2.387          | -     | 176.9  | -     | -     | 176.6                            | 176.6                            |
| Exp. <sup>1</sup>                  | 1.618           |                  |                  |                  |                  |         |                |       |        |       |       |                                  |                                  |
| [(14-TMC)(Cl)MnOOH] <sup>+</sup>   |                 |                  |                  |                  |                  |         |                |       |        |       |       |                                  |                                  |
| <sup>5</sup> Mn <sub>hs</sub>      | 1.916           | 2.132            | 2.318            | 2.179            | 2.313            | 2.236   | 2.344          | 1.511 | 169.9  | 127.8 | 99.6  | 173.7                            | 173.7                            |
| <sup>3</sup> Mn <sub>is</sub>      | 1.885           | 2.117            | 2.162            | 2.175            | 2.130            | 2.146   | 2.351          | 1.519 | 171.2  | 127.1 | 99.3  | 175.8                            | 175.3                            |
| <sup>1</sup> Mn <sub>is</sub>      | 1.767           | 2.127            | 2.173            | 2.184            | 2.135            | 2.155   | 2.343          | 1.537 | 170.8  | 130.1 | 99.1  | 176.7                            | 176.3                            |
| <sup>5</sup> Mn <sub>hs</sub> -ts  | 1.748           | 2.171            | 2.153            | 2.140            | 2.158            | 2.156   | 2.433          | 1.854 | 176.8  | 156.5 | 92.6  | 174.0                            | 174.2                            |
| <sup>3</sup> Mn <sub>is</sub> -ts  | 1.723           | 2.106            | 2.160            | 2.179            | 2.122            | 2.142   | 2.393          | 1.852 | 171.6  | 130.7 | 89.2  | 176.6                            | 175.8                            |
| <sup>4</sup> Mn <sub>hs</sub> -Int | 1.680           | 2.134            | 2.157            | 2.134            | 2.157            | 2.145   | 2.417          | -     | 177.7  | -     | -     | 175.1                            | 175.1                            |
| <sup>2</sup> Mn <sub>ls</sub> -Int | 1.637           | 2.143            | 2.154            | 2.143            | 2.153            | 2.148   | 2.370          | -     | 177.1  | -     | -     | 175.6                            | 175.5                            |
| [(14-TMC)(Cl)FeOOH] <sup>+</sup>   |                 |                  |                  |                  |                  |         |                |       |        |       |       |                                  |                                  |
| <sup>6</sup> Fe <sub>hs</sub>      | 1.953           | 2.209            | 2.229            | 2.247            | 2.231            | 2.249   | 2.378          | 1.495 | 173.5  | 134.8 | 101.1 | 173.0                            | 172.4                            |
| <sup>4</sup> Fe <sub>is</sub>      | 2.021           | 2.124            | 2.166            | 2.151            | 2.156            | 2.154   | 2.457          | 1.514 | 130.6  | 130.6 | 100.8 | 174.6                            | 174.3                            |
| <sup>2</sup> Fe <sub>ls</sub>      | 1.858           | 2.137            | 2.157            | 2.107            | 2.109            | 2.127   | 2.344          | 1.522 | 171.4  | 126.5 | 99.3  | 176.5                            | 175.9                            |
| <sup>6</sup> Fe <sub>hs</sub> -ts  | 1.677           | 2.242            | 2.235            | 2.209            | 2.197            | 2.221   | 2.322          | 2.052 | 177.1  | 157.7 | 88.2  | 172.8                            | 172.5                            |
| <sup>4</sup> Fe <sub>is</sub> -ts  | 1.718           | 2.137            | 2.150            | 2.140            | 2.124            | 2.139   | 2.385          | 1.822 | 177.1  | 159.3 | 93.9  | 174.9                            | 174.7                            |
| <sup>2</sup> Fe <sub>ls</sub> -ts  | 1.675           | 2.098            | 2.138            | 2.157            | 2.111            | 2.126   | 2.351          | 2.019 | 173.8  | 136.5 | 83.7  | 176.7                            | 176.1                            |
| <sup>5</sup> Fe <sub>hs</sub> -Int | 1.659           | 2.202            | 2.202            | 2.238            | 2.237            | 2.219   | 2.327          | -     | 177.5  | -     | -     | 173.4                            | 173.4                            |
| <sup>3</sup> Fe <sub>is</sub> -Int | 1.657           | 2.195            | 2.235            | 2.207            | 2.242            | 2.219   | 2.362          | -     | 178.1  | -     | -     | 175.4                            | 175.4                            |
| <sup>1</sup> Fe <sub>ls</sub> -Int | 1.669           | 2.119            | 2.119            | 2.128            | 2.128            | 2.123   | 2.346          | -     | 176.9  | -     | -     | 175.3                            | 175.3                            |

|                                    |       |       |       |       |       |       |       |       |       |       |       |       |       |
|------------------------------------|-------|-------|-------|-------|-------|-------|-------|-------|-------|-------|-------|-------|-------|
| Exp. <sup>2</sup>                  | 1.646 | -     | -     | 2.067 | 2.069 | 2.109 | 2.117 | -     | -     | -     | -     | -     | -     |
| [(14-TMC)(Cl)CoOOH] <sup>+</sup>   |       |       |       |       |       |       |       |       |       |       |       |       |       |
| <sup>5</sup> Co <sub>hs</sub>      | 1.984 | 2.180 | 2.221 | 2.216 | 2.209 | 2.206 | 2.415 | 1.472 | 171.4 | 132.1 | 102.3 | 174.0 | 173.3 |
| <sup>3</sup> Co <sub>is</sub>      | 1.917 | 2.063 | 2.243 | 2.117 | 2.235 | 2.164 | 2.384 | 1.511 | 172.0 | 128.6 | 100.1 | 175.6 | 175.2 |
| <sup>1</sup> Co <sub>is</sub>      | 1.934 | 2.073 | 2.114 | 2.133 | 2.080 | 2.100 | 2.342 | 1.525 | 171.2 | 123.8 | 99.3  | 176.2 | 175.7 |
| <sup>5</sup> Co <sub>hs</sub> -ts  | 1.674 | 2.226 | 2.226 | 2.212 | 2.212 | 2.219 | 2.286 | 1.921 | 176.2 | 162.5 | 92.3  | 173.1 | 173.1 |
| <sup>6</sup> Co <sub>hs</sub> -Int | 1.872 | 2.221 | 2.225 | 2.221 | 2.226 | 2.223 | 2.374 | -     | 174.4 | -     | -     | 170.9 | 170.9 |
| <sup>4</sup> Co <sub>is</sub> -Int | 1.647 | 2.199 | 2.221 | 2.199 | 2.221 | 2.210 | 2.284 | -     | 177.5 | -     | -     | 173.9 | 173.8 |
| <sup>2</sup> Co <sub>is</sub> -Int | 1.835 | 2.090 | 2.098 | 2.090 | 2.099 | 2.094 | 2.353 | -     | 177.4 | -     | -     | 173.7 | 173.7 |
| Exp. <sup>3-4</sup>                | 1.72  |       |       |       |       |       |       |       |       |       |       |       |       |
| [(14-TMC)(Cl)NiOOH] <sup>+</sup>   |       |       |       |       |       |       |       |       |       |       |       |       |       |
| <sup>2</sup> Ni <sub>is</sub>      | 2.013 | 2.148 | 2.211 | 2.198 | 2.196 | 2.189 | 2.341 | 1.459 | 171.1 | 128.2 | 103.2 | 173.8 | 173.7 |
| <sup>4</sup> Ni <sub>hs</sub> -ts  | 1.836 | 2.208 | 2.162 | 2.192 | 2.172 | 2.183 | 2.284 | 2.072 | 176.2 | 154.1 | 96.0  | 171.7 | 171.8 |
| <sup>5</sup> Ni <sub>hs</sub> -Int | 1.838 | 2.218 | 2.196 | 2.197 | 2.218 | 2.207 | 2.376 | -     | 174.8 | -     | -     | 172.2 | 172.2 |
| <sup>1</sup> Ni <sub>is</sub> -Int | 1.853 | 2.174 | 2.173 | 2.184 | 2.184 | 2.179 | 2.289 | -     | 177.1 | -     | -     | 171.5 | 171.5 |
| [(14-TMC)(Cl)CuOOH] <sup>+</sup>   |       |       |       |       |       |       |       |       |       |       |       |       |       |
| <sup>3</sup> Cu <sub>hs</sub>      | 2.291 | 2.150 | 2.181 | 2.177 | 2.183 | 2.173 | 2.501 | 1.455 | 171.9 | 130.8 | 104.7 | 171.1 | 171.5 |
| <sup>1</sup> Cu <sub>hs</sub>      | 1.919 | 2.207 | 2.328 | 2.254 | 2.326 | 2.279 | 2.262 | 1.475 | 168.1 | 125.5 | 102.8 | 174.0 | 174.4 |
| <sup>3</sup> Cu <sub>hs</sub> -ts  | 2.004 | 2.242 | 2.190 | 2.228 | 2.218 | 2.219 | 2.358 | 2.036 | 175.4 | 135.5 | 85.4  | 171.4 | 171.4 |
| <sup>4</sup> Cu <sub>hs</sub> -Int | 2.031 | 2.189 | 2.190 | 2.188 | 2.188 | 2.189 | 2.420 | -     | 176.3 | -     | -     | 170.5 | 170.5 |
| <sup>2</sup> Cu <sub>is</sub> -Int | 2.083 | 2.183 | 2.184 | 2.177 | 2.178 | 2.180 | 2.448 | -     | 176.4 | -     | -     | 170.3 | 170.3 |

**Table S3.** B3LYP-D2 computed selected spin density values of the 14-TMC species, transition states, and metal-oxo.

| Spin state                         | Metal  | O1     | O2     |
|------------------------------------|--------|--------|--------|
| [(14-TMC)(Cl)CrOOH] <sup>+</sup>   |        |        |        |
| <sup>4</sup> Cr <sub>hs</sub>      | 3.179  | -0.001 | 0.040  |
| <sup>2</sup> Cr <sub>ls</sub>      | 1.126  | -0.045 | 0.007  |
| <sup>4</sup> Cr <sub>hs</sub> -ts  | 2.812  | -0.513 | 0.961  |
| <sup>2</sup> Cr <sub>ls</sub> -ts  | 0.697  | -0.281 | 0.663  |
| <sup>3</sup> Cr <sub>hs</sub> -Int | 2.784  | -0.569 | -      |
| <sup>1</sup> Cr <sub>ls</sub> -Int | 0      | 0      | -      |
| [(14-TMC)(Cl)MnOOH] <sup>+</sup>   |        |        |        |
| <sup>5</sup> Mn <sub>hs</sub>      | 3.987  | -0.010 | 0.042  |
| <sup>3</sup> Mn <sub>is</sub>      | 2.098  | 0.042  | 0.023  |
| <sup>1</sup> Mn <sub>ls</sub>      | 0.000  | 0.000  | 0.000  |
| <sup>5</sup> Mn <sub>hs</sub> -ts  | 3.341  | 0.269  | 0.668  |
| <sup>3</sup> Mn <sub>is</sub> -ts  | 2.493  | 0.272  | -0.549 |
| <sup>4</sup> Mn <sub>hs</sub> -Int | 2.677  | 0.545  | -      |
| <sup>2</sup> Mn <sub>ls</sub> -Int | 1.165  | -0.061 | -      |
| [(14-TMC)(Cl)FeOOH] <sup>+</sup>   |        |        |        |
| <sup>6</sup> Fe <sub>hs</sub>      | 3.980  | 0.277  | 0.051  |
| <sup>4</sup> Fe <sub>is</sub>      | 2.896  | 0.194  | 0.030  |
| <sup>2</sup> Fe <sub>ls</sub>      | 1.039  | 0.089  | -0.000 |
| <sup>6</sup> Fe <sub>hs</sub> -ts  | 3.275  | 0.528  | 0.869  |
| <sup>4</sup> Fe <sub>is</sub> -ts  | 2.352  | -0.151 | 0.0058 |
| <sup>2</sup> Fe <sub>ls</sub> -ts  | 1.309  | 0.575  | -0.775 |
| <sup>5</sup> Fe <sub>hs</sub> -Int | 3.081  | 0.632  | -      |
| <sup>3</sup> Fe <sub>is</sub> -Int | 1.313  | 0.793  | -      |
| <sup>1</sup> Fe <sub>ls</sub> -Int | 0      | 0      | -      |
| [(14-TMC)(Cl)CoOOH] <sup>+</sup>   |        |        |        |
| <sup>5</sup> Co <sub>hs</sub>      | 2.776  | 0.437  | 0.083  |
| <sup>3</sup> Co <sub>is</sub>      | 1.829  | 0.173  | 0.013  |
| <sup>1</sup> Co <sub>ls</sub>      | 0.000  | 0.000  | 0.000  |
| <sup>5</sup> Co <sub>hs</sub> -ts  | 2.164  | 0.673  | 0.798  |
| <sup>6</sup> Co <sub>hs</sub> -Int | 2.750  | 1.400  | -      |
| <sup>4</sup> Co <sub>is</sub> -Int | 1.855  | 0.884  | -      |
| <sup>2</sup> Co <sub>ls</sub> -Int | -0.026 | 0.974  | -      |
| [(14-TMC)(Cl)NiOOH] <sup>+</sup>   |        |        |        |
| <sup>2</sup> Ni <sub>ls</sub>      | 1.277  | -0.099 | -0.344 |
| <sup>4</sup> Ni <sub>hs</sub> -ts  | 0.936  | 0.928  | 0.853  |



|                                    |        |        |       |
|------------------------------------|--------|--------|-------|
| <sup>5</sup> Ni <sub>hs</sub> -Int | 1.545  | 1.571  | -     |
| <sup>3</sup> Ni <sub>is</sub> -Int | 0.957  | -1.156 | -     |
| [(14-TMC)(Cl)CuOOH] <sup>+</sup>   |        |        |       |
| <sup>3</sup> Cu <sub>hs</sub>      | 0.519  | 0.474  | 0.123 |
| <sup>1</sup> Cu <sub>is</sub>      | 0.000  | 0.000  | 0.000 |
| <sup>3</sup> Cu <sub>hs</sub> -ts  | 0.030  | 1.231  | 0.796 |
| <sup>4</sup> Cu <sub>hs</sub> -Int | 0.534  | 1.362  | -     |
| <sup>2</sup> Cu <sub>is</sub> -Int | -0.165 | 1.425  | -     |

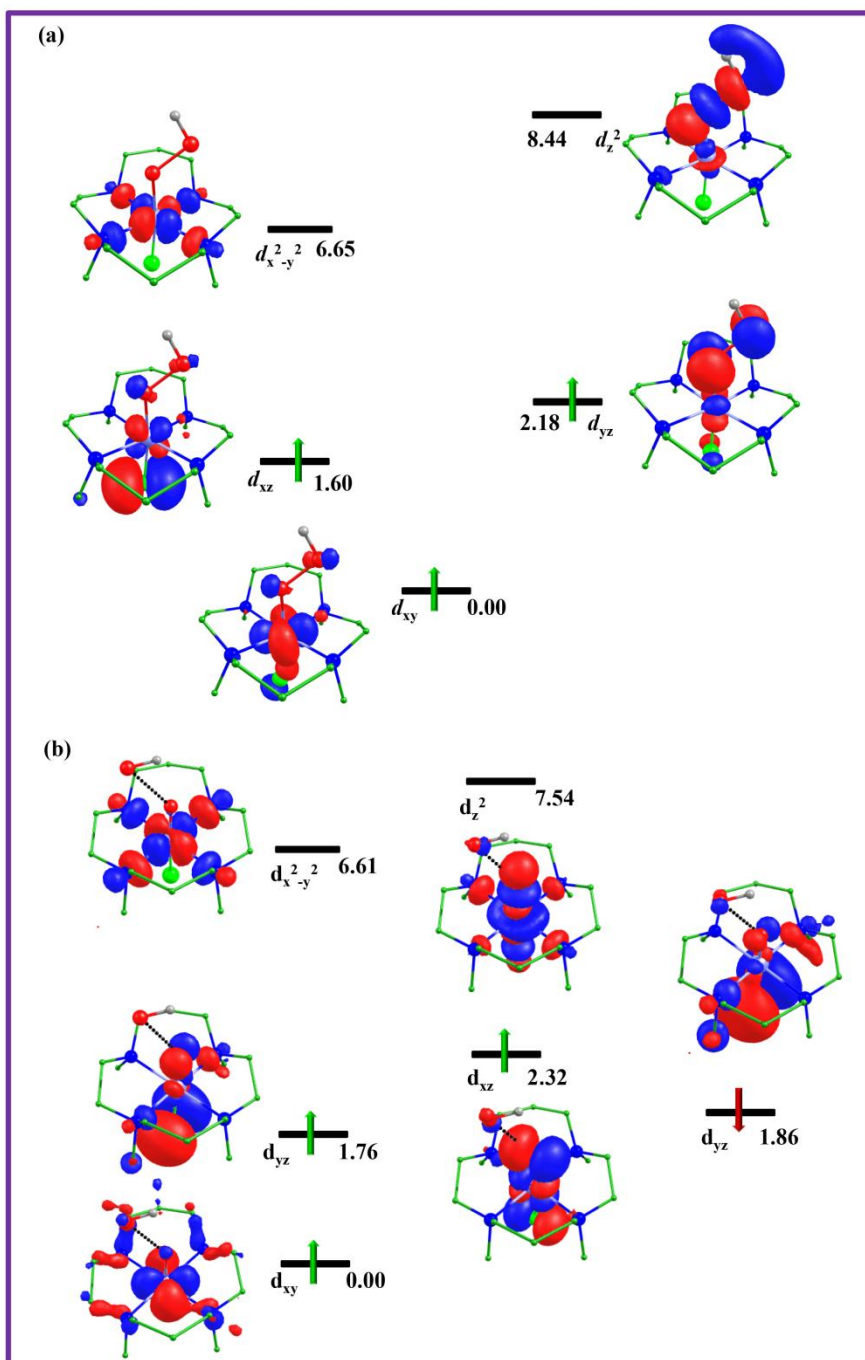

Figure S3. Computed eigenvalue plot incorporating energies computed for  $d$ -based orbitals for alpha corresponding to the ground state a)  ${}^4\text{Cr}_{\text{hs}}$ ; b)  ${}^4\text{Cr}_{\text{hs-ts}}$  of the chromium(III) hydroperoxo species (energies are given in eV).

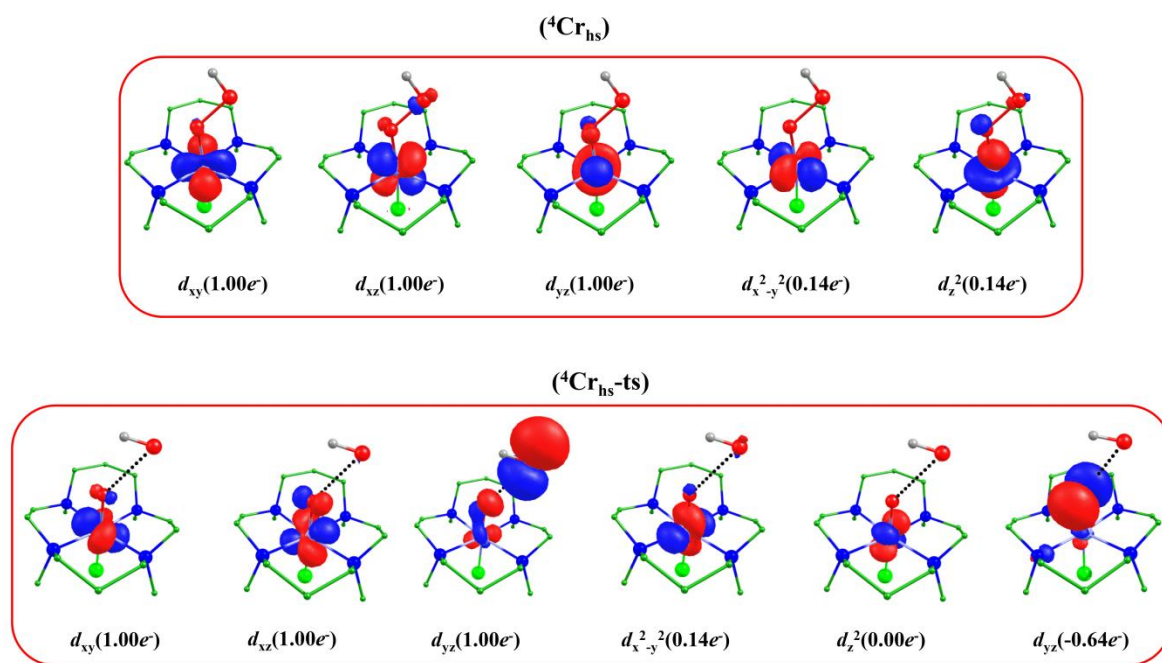

Figure S4. Spin natural orbitals and their occupations (noted in parenthesis) of  ${}^4\text{Cr}_{\text{hs}}$ , and  ${}^4\text{Cr}_{\text{hs}}\text{-ts}$ .

**Table S4.** Computed Wiberg bond indices of chromium-copper species.

| Spin State                                     | M-O   | O1-O2 |
|------------------------------------------------|-------|-------|
| [(14-TMC)(Cl)CrOOH] <sup>+</sup>               |       |       |
| <sup>4</sup> Cr <sub>hs</sub>                  | 0.218 | 0.246 |
| <sup>4</sup> Cr <sub>hs</sub> -ts              | 0.374 | 0.054 |
| <sup>3</sup> Cr <sub>hs</sub> -Int             | 0.403 | -     |
| [(14-TMC)(Cl)MnOOH] <sup>+</sup> ; II Species  |       |       |
| <sup>5</sup> Mn <sub>hs</sub>                  | 0.198 | 0.245 |
| <sup>5</sup> Mn <sub>hs</sub> -ts              | 0.443 | 0.180 |
| <sup>4</sup> Mn <sub>hs</sub> -Int             | 0.624 | -     |
| [(14-TMC)(Cl)FeOOH] <sup>+</sup> ; III Species |       |       |
| <sup>6</sup> Fe <sub>hs</sub>                  | 0.260 | 0.249 |
| <sup>4</sup> Fe <sub>is</sub> -ts              | 0.556 | 0.107 |
| <sup>5</sup> Fe <sub>hs</sub> -Int             | 0.631 | -     |
| [(14-TMC)(Cl)CoOOH] <sup>+</sup> ; IV Species  |       |       |
| <sup>1</sup> Co <sub>is</sub>                  | 0.152 | 0.244 |
| <sup>5</sup> Co <sub>hs</sub>                  | 0.539 | 0.147 |
| <sup>4</sup> Co <sub>is</sub> -Int             | 0.640 | -     |
| [(14-TMC)(Cl)NiOOH] <sup>+</sup> ; V Species   |       |       |
| <sup>2</sup> Ni <sub>is</sub>                  | 0.101 | 0.246 |
| <sup>4</sup> Ni <sub>hs</sub> -ts              | 0.202 | 0.143 |
| <sup>2</sup> Ni <sub>is</sub>                  | 0.423 | -     |
| [(14-TMC)(Cl)CuOOH] <sup>+</sup> ; VI Species  |       |       |
| <sup>3</sup> Cu <sub>hs</sub>                  | 0.106 | 0.306 |
| <sup>3</sup> Cu <sub>hs</sub> -ts              | 0.158 | 0.088 |
| <sup>4</sup> Cu <sub>hs</sub> -Int             | 0.177 | -     |

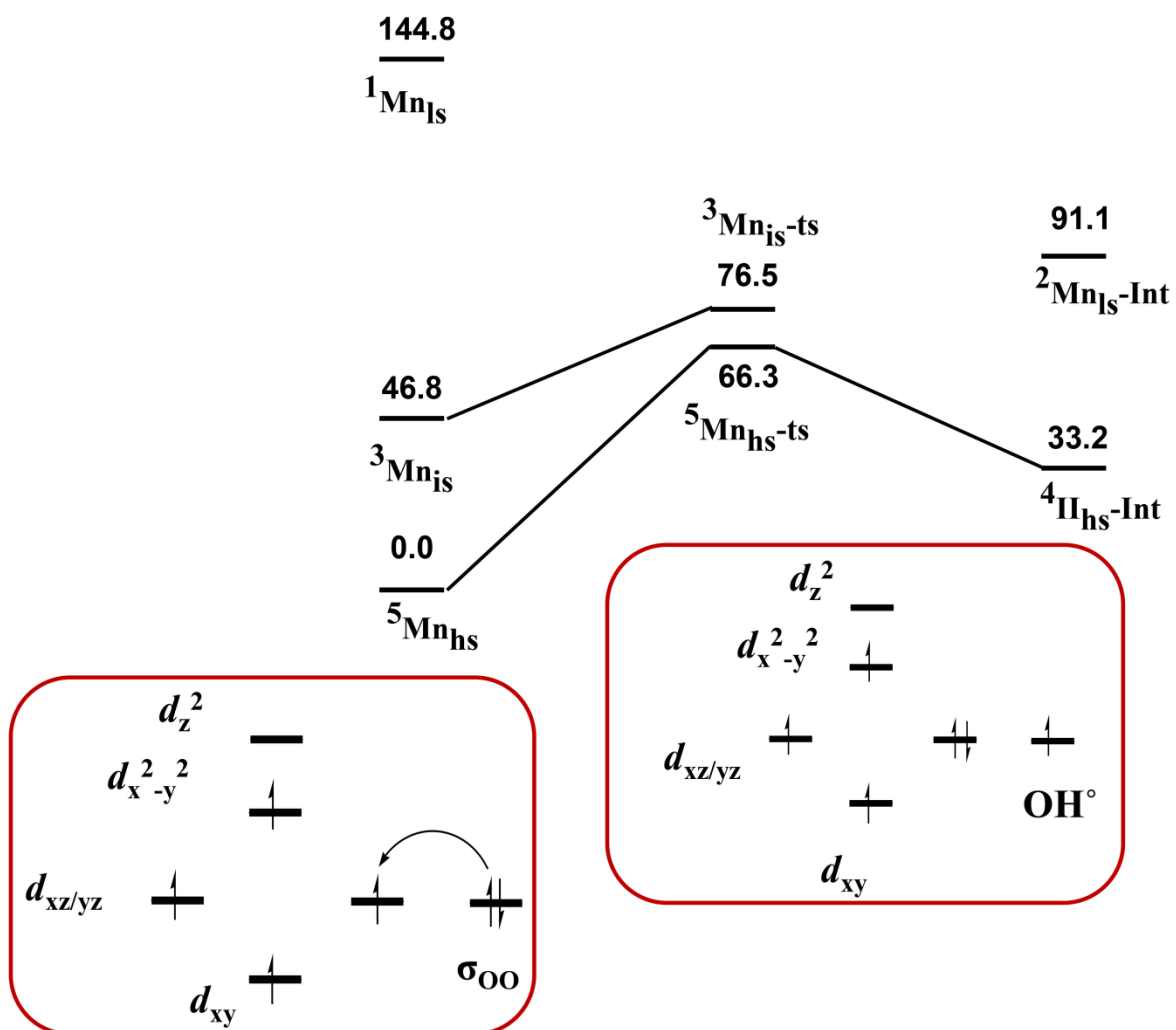

Figure S5. B3LYP-D2 computed energy surface ( $\Delta G$  in  $\text{kJ mol}^{-1}$ ) for the O---O bond cleavage of manganese hydroperoxo species.

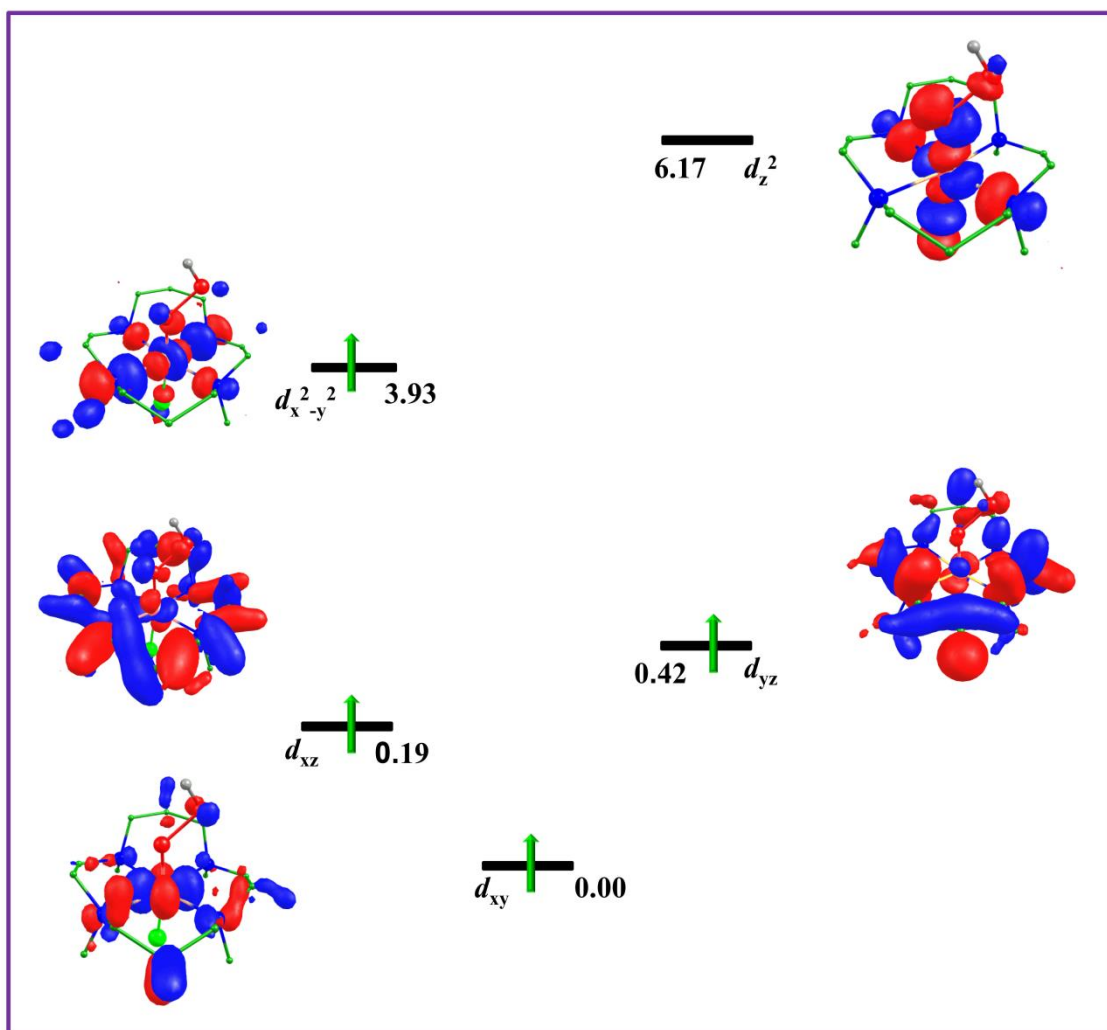

Figure S6. Computed eigenvalue plot incorporating energies computed for  $d$ -based orbitals for alpha spin corresponding to the ground state  $^5\text{Mn}_{\text{hs}}$  of the manganese hydroperoxo species (energies are given in eV).

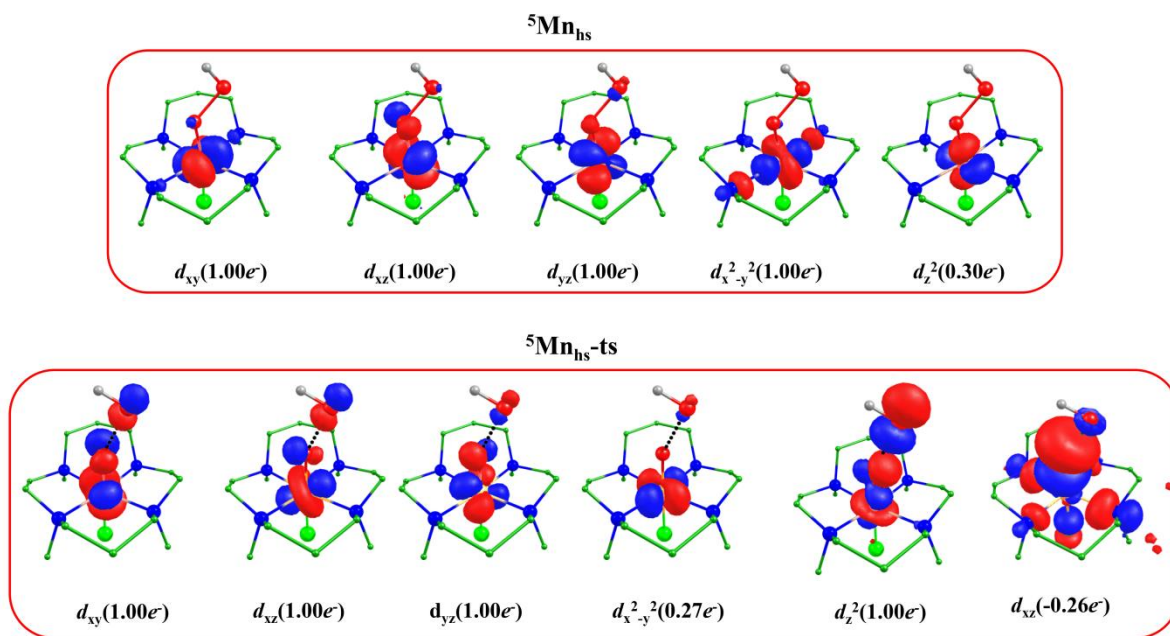

Figure S7. Spin natural orbitals and their occupations (noted in parenthesis) of  ${}^5\text{Mn}_{\text{hs}}$ , and  ${}^5\text{Mn}_{\text{hs-ts}}$ .

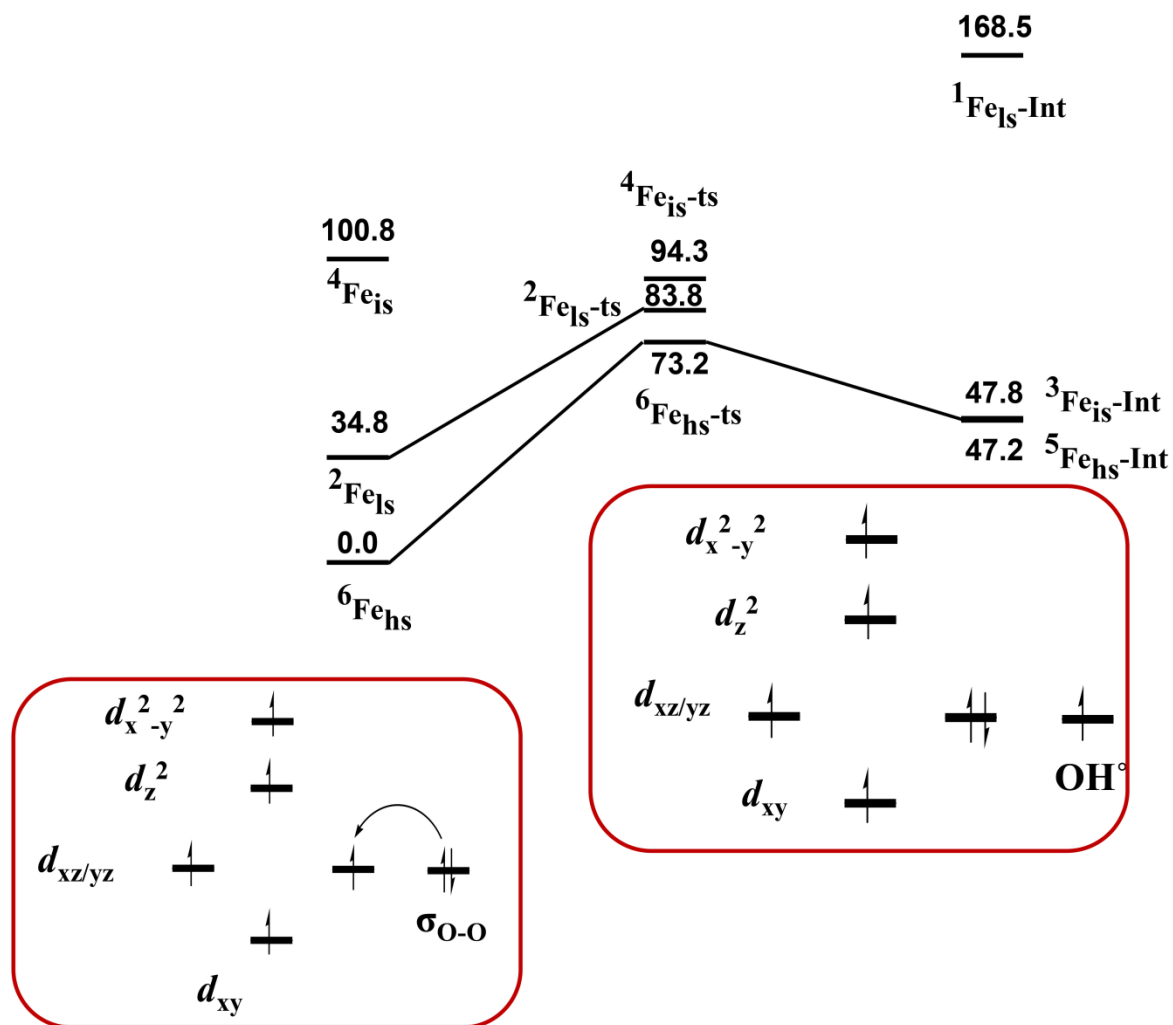

Figure S8. B3LYP-D2 computed energy surface ( $\Delta G$  in kJ mol<sup>-1</sup>) for the O---O bond cleavage of iron(III) hydroperoxo species.



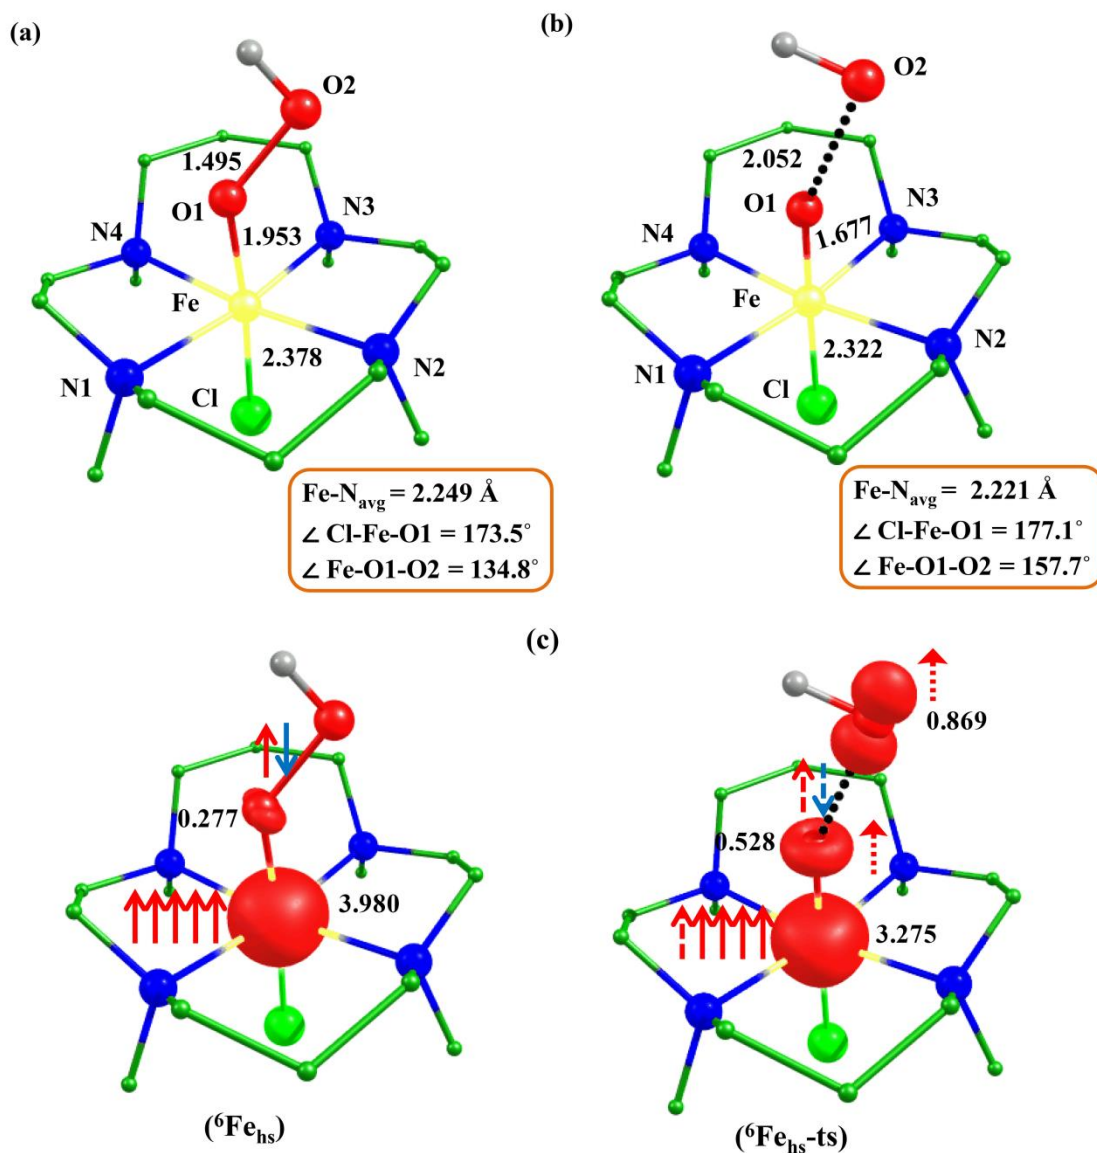

Figure S9. B3LYP-D2 (a) optimized structure of the ground state of iron(III) hydroperoxo ( ${}^6\text{Fe}_{\text{hs}}$ ); (b) optimized structure of the ground state of the transition state of iron(III) hydroperoxo ( ${}^6\text{Fe}_{\text{hs-ts}}$ ); (c) scheme for the formation of  $\pi$  bond between iron and oxygen center by the involvement of O-O bond electrons and iron center.

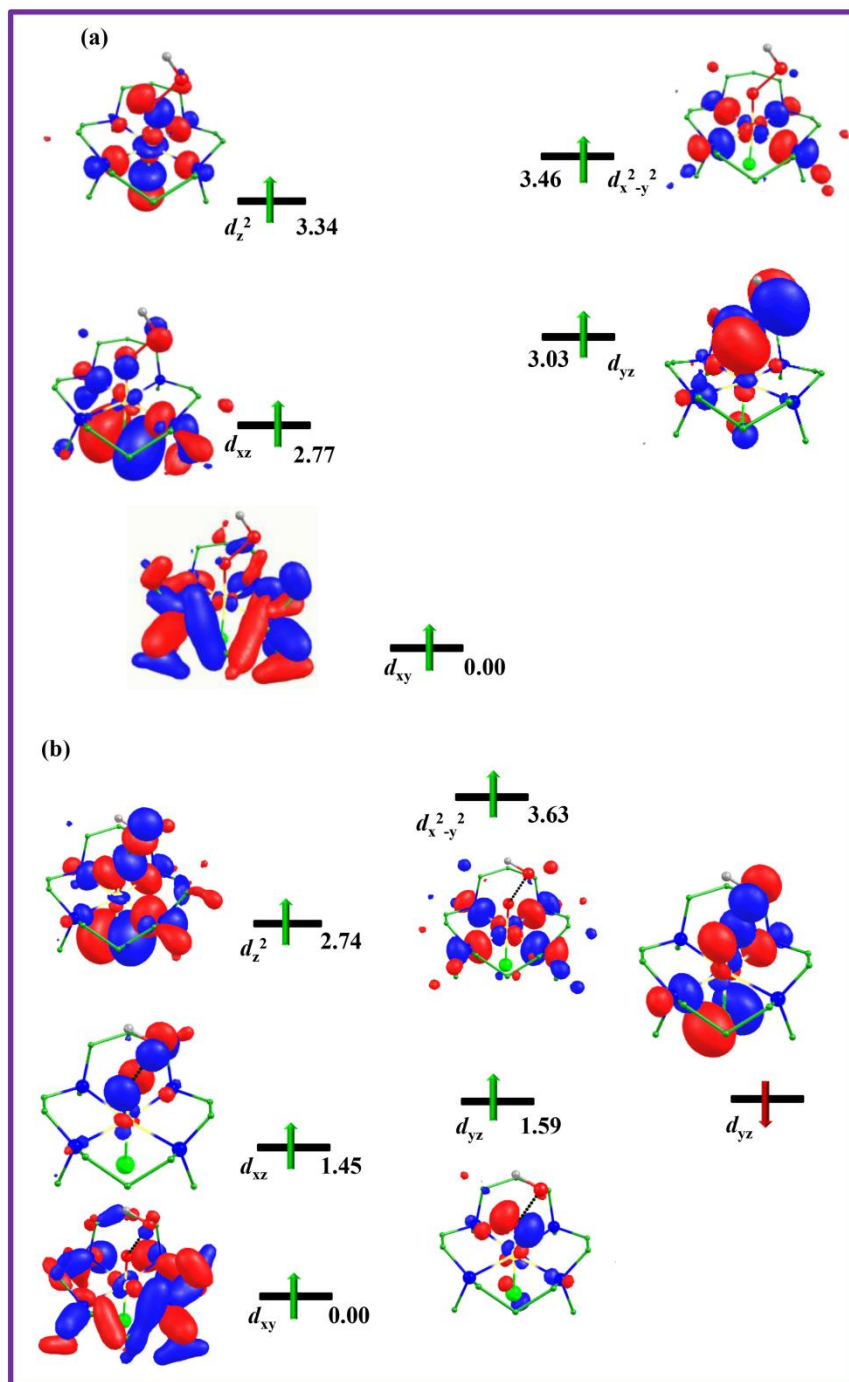

Figure S10. Computed eigenvalue plot incorporating energies computed for  $d$ -based orbitals for alpha spin corresponding to the ground state of the iron(III) hydroperoxo a)  ${}^6\text{Fe}_{\text{hs}}$ ; b)  ${}^6\text{Fe}_{\text{hs-ts}}$  (energies are given in eV).

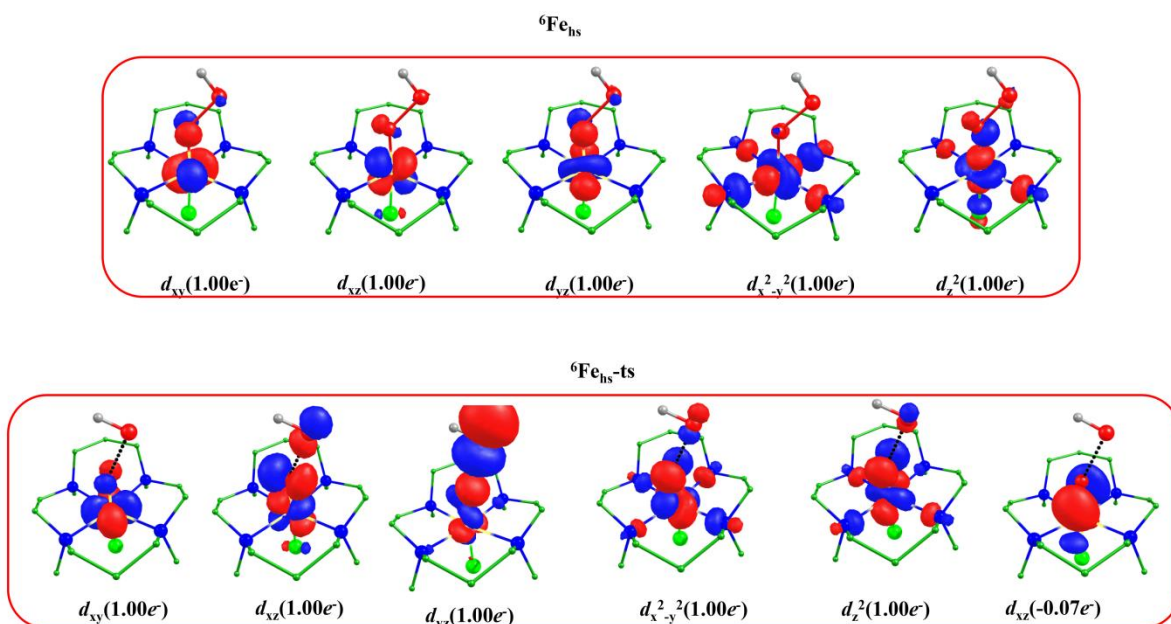

Figure S11. Spin natural orbitals and their occupations (noted in parenthesis) of  ${}^6\text{Fe}_{\text{hs}}$ , and  ${}^6\text{Fe}_{\text{hs-ts}}$ .

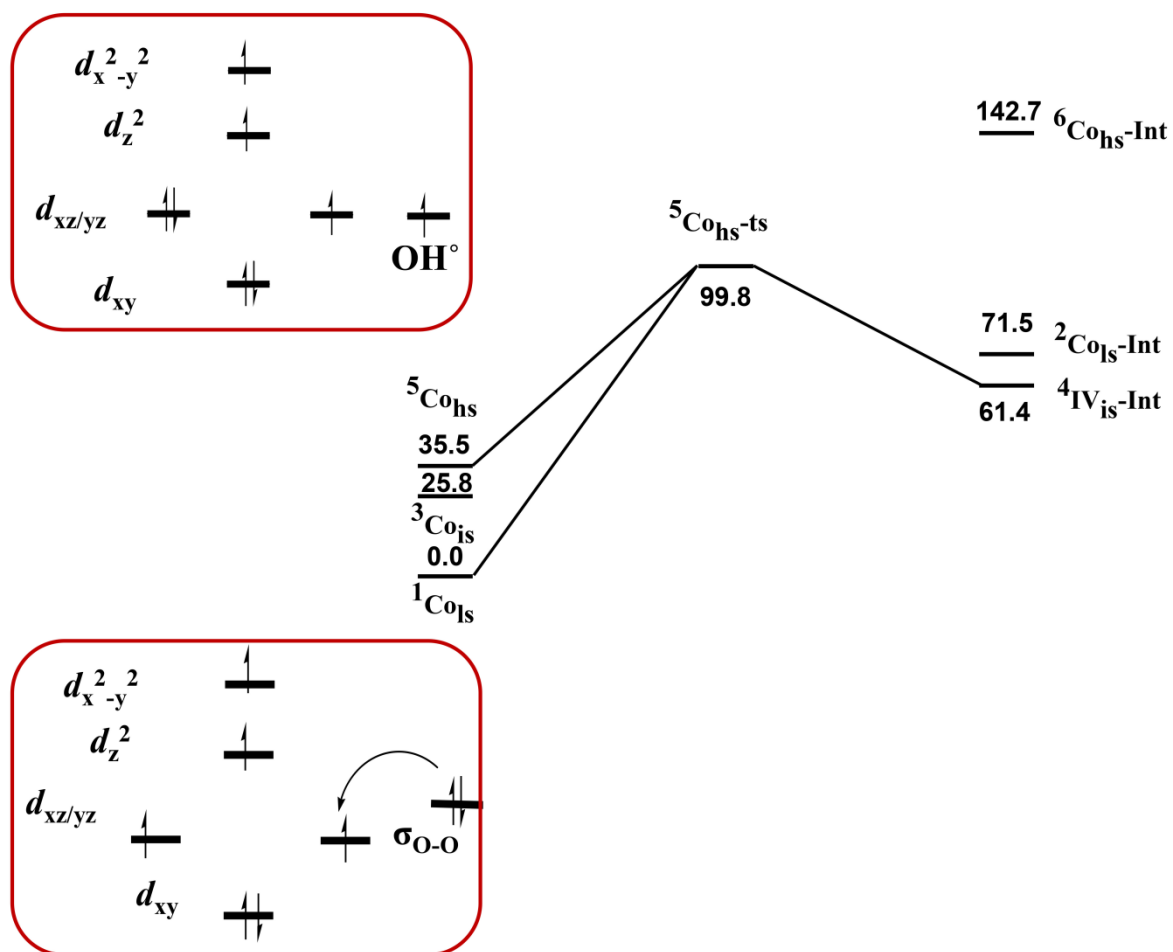

Figure S12. B3LYP-D2 computed energy surface ( $\Delta G$  in  $\text{kJ mol}^{-1}$ ) for the O---O bond cleavage of cobalt(III) hydroperoxo species.

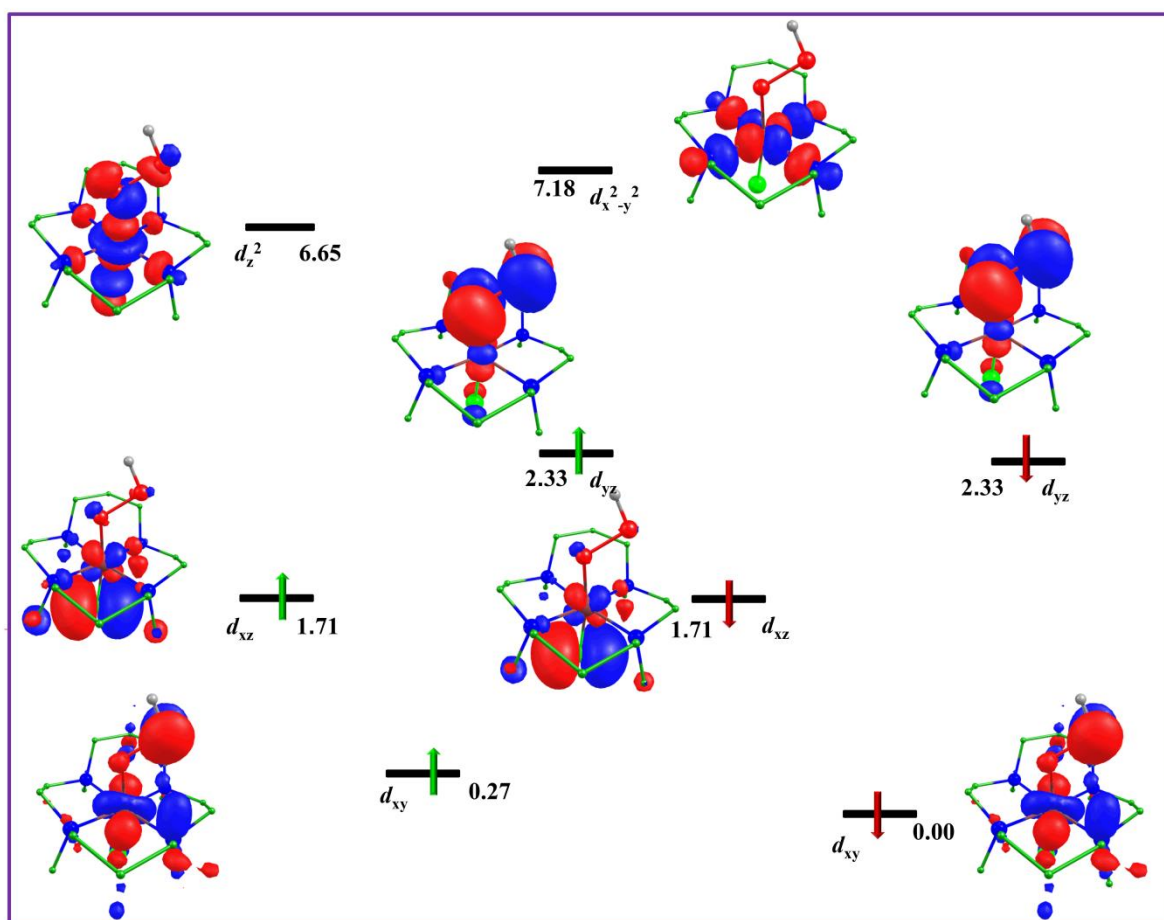

Figure S13. Computed eigenvalue plot incorporating energies computed for  $d$ -based orbitals for alpha and beta spin corresponding to the ground state  ${}^1\text{Co}_{1s}$  of the cobalt(III) hydroperoxo species (energies are given in eV).

${}^5\text{Co}_{\text{hs}}\text{-ts}$

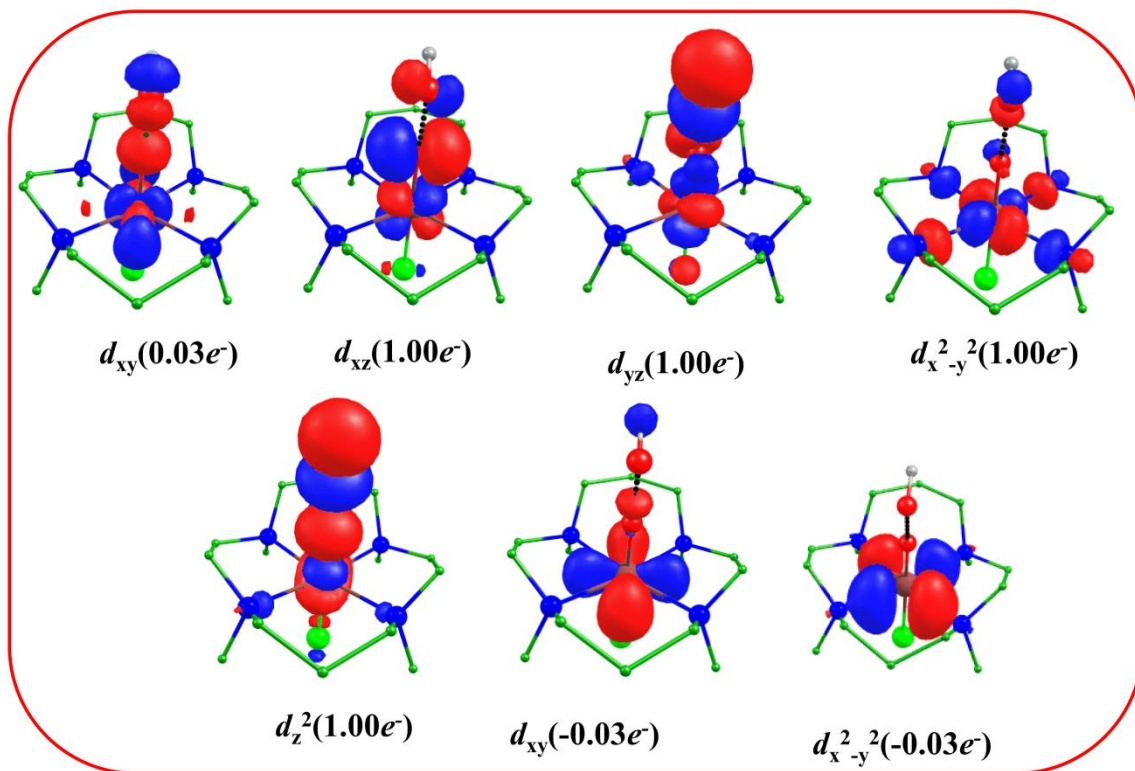

Figure S14. Spin natural orbitals and their occupations (noted in parenthesis) of  ${}^5\text{Co}_{\text{hs}}\text{-ts}$ .

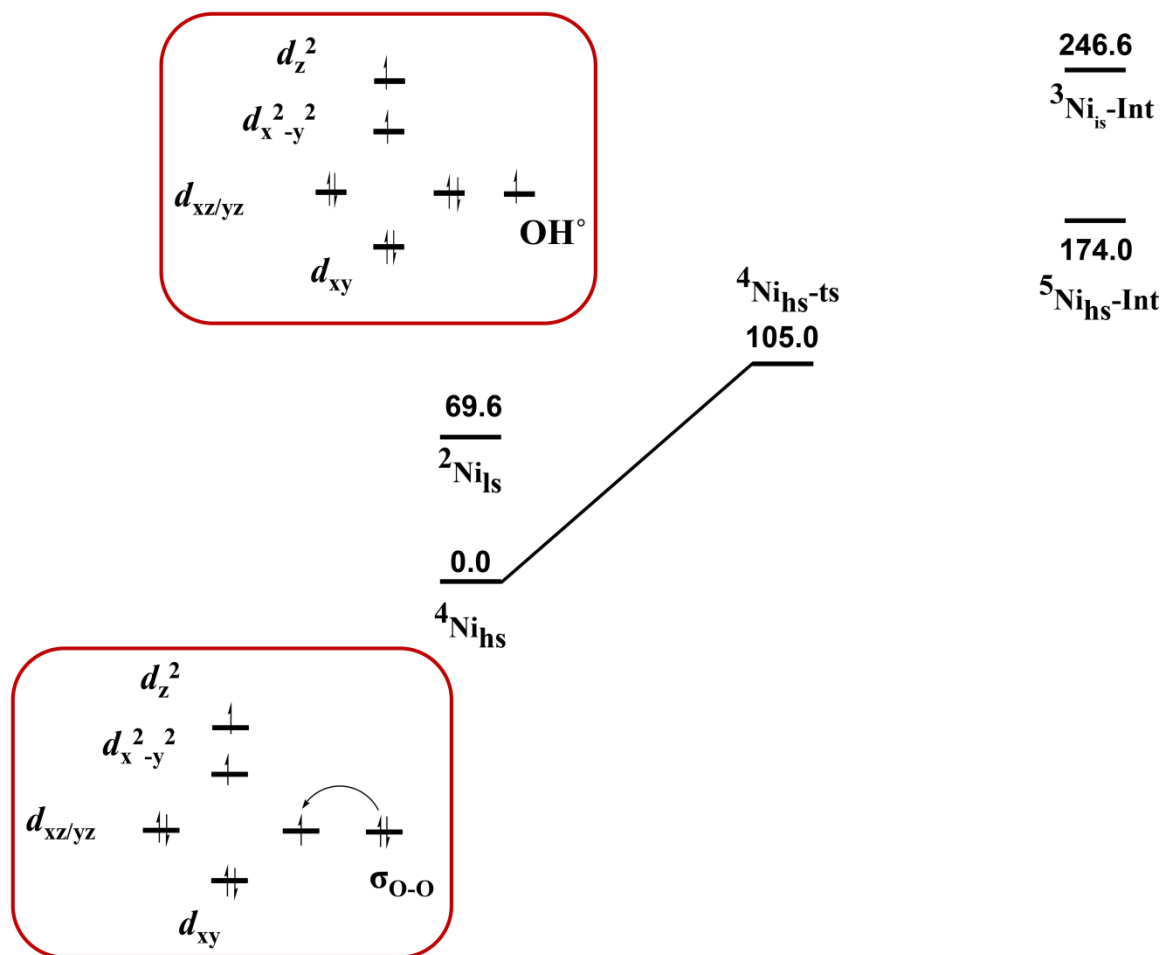

Figure S15. B3LYP-D2 computed energy surface ( $\Delta G$  in  $\text{kJ mol}^{-1}$ ) for the O---O bond cleavage of nickel(III) hydroperoxo.

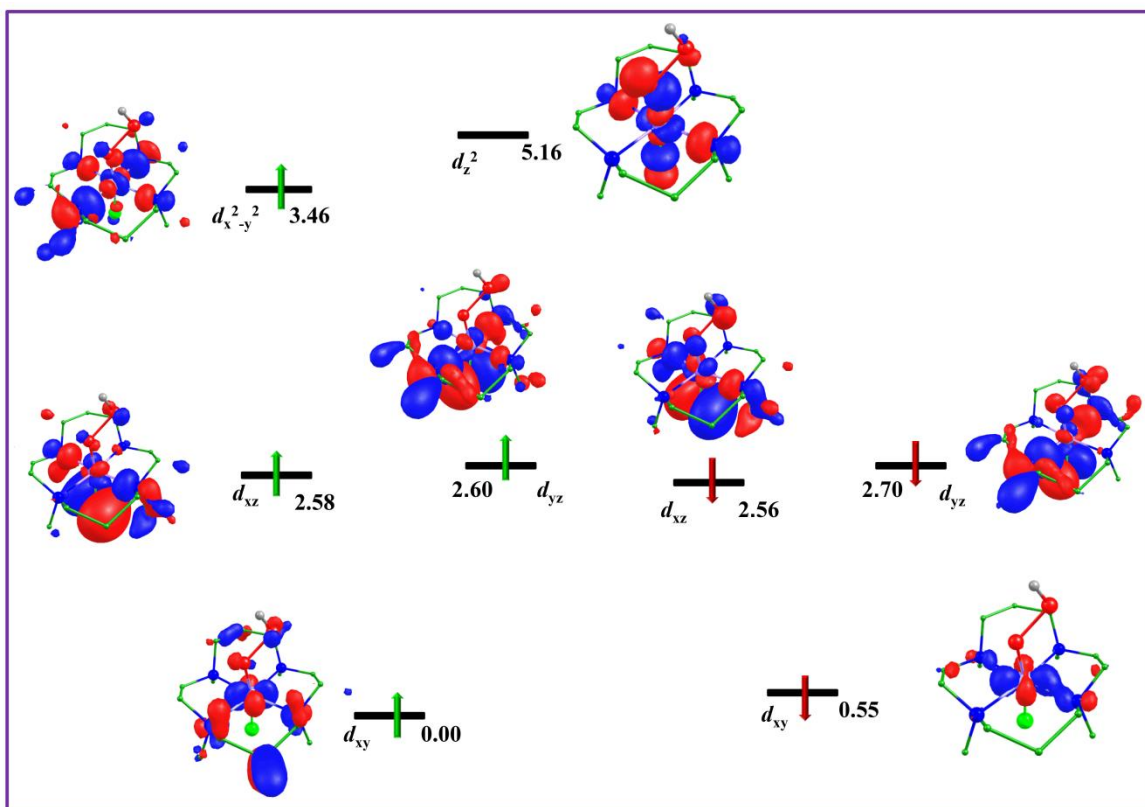

Figure S16. Computed eigenvalue plot incorporating energies computed for  $d$ -based orbitals for alpha and beta spin corresponding to the ground state  $^2\text{Ni}_{1s}$  of the species V (energies are given in eV).



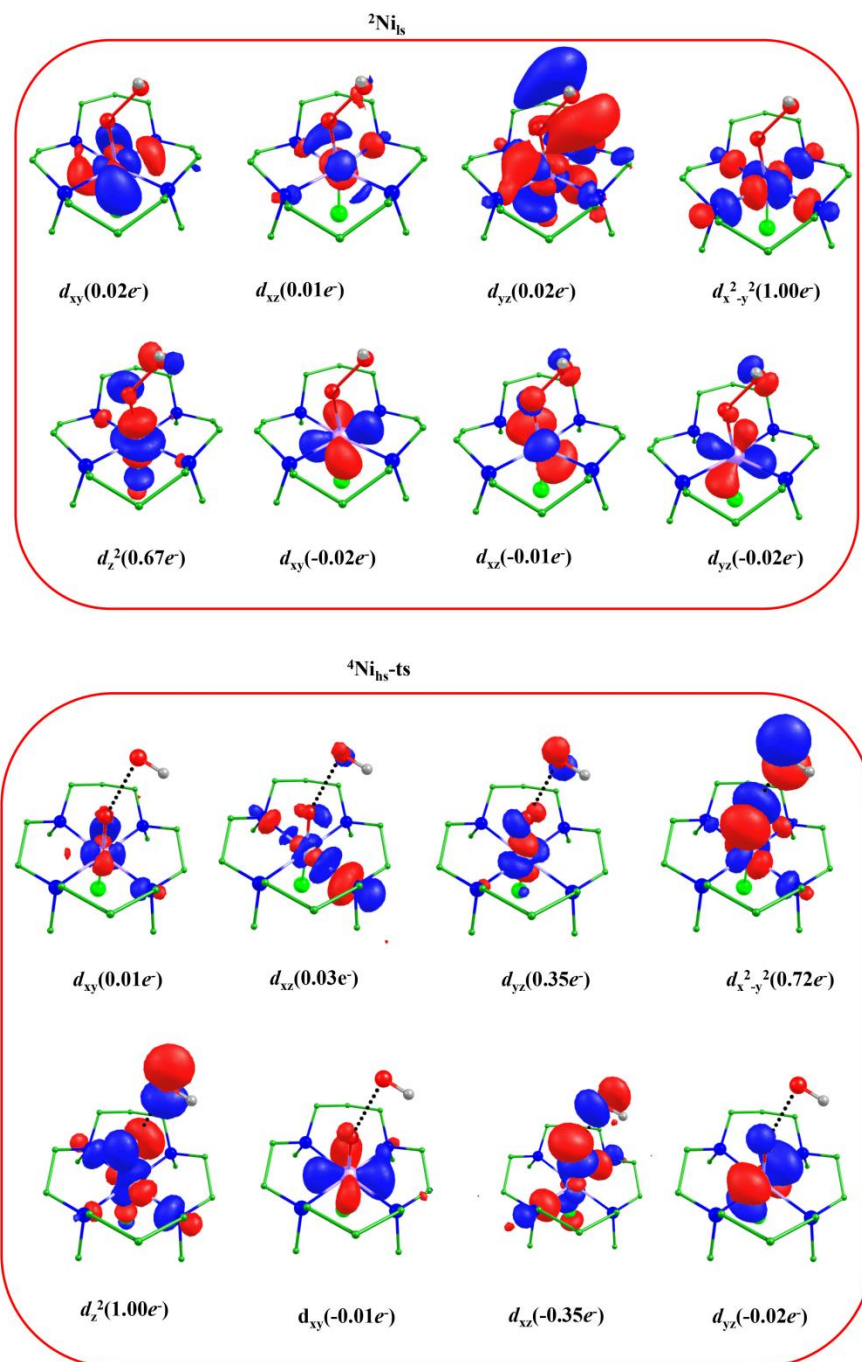

Figure S17. Spin natural orbitals and their occupations (noted in parenthesis) of  ${}^2\text{Ni}_{\text{hs}}$  and  ${}^4\text{Ni}_{\text{hs-ts}}$  of species V.

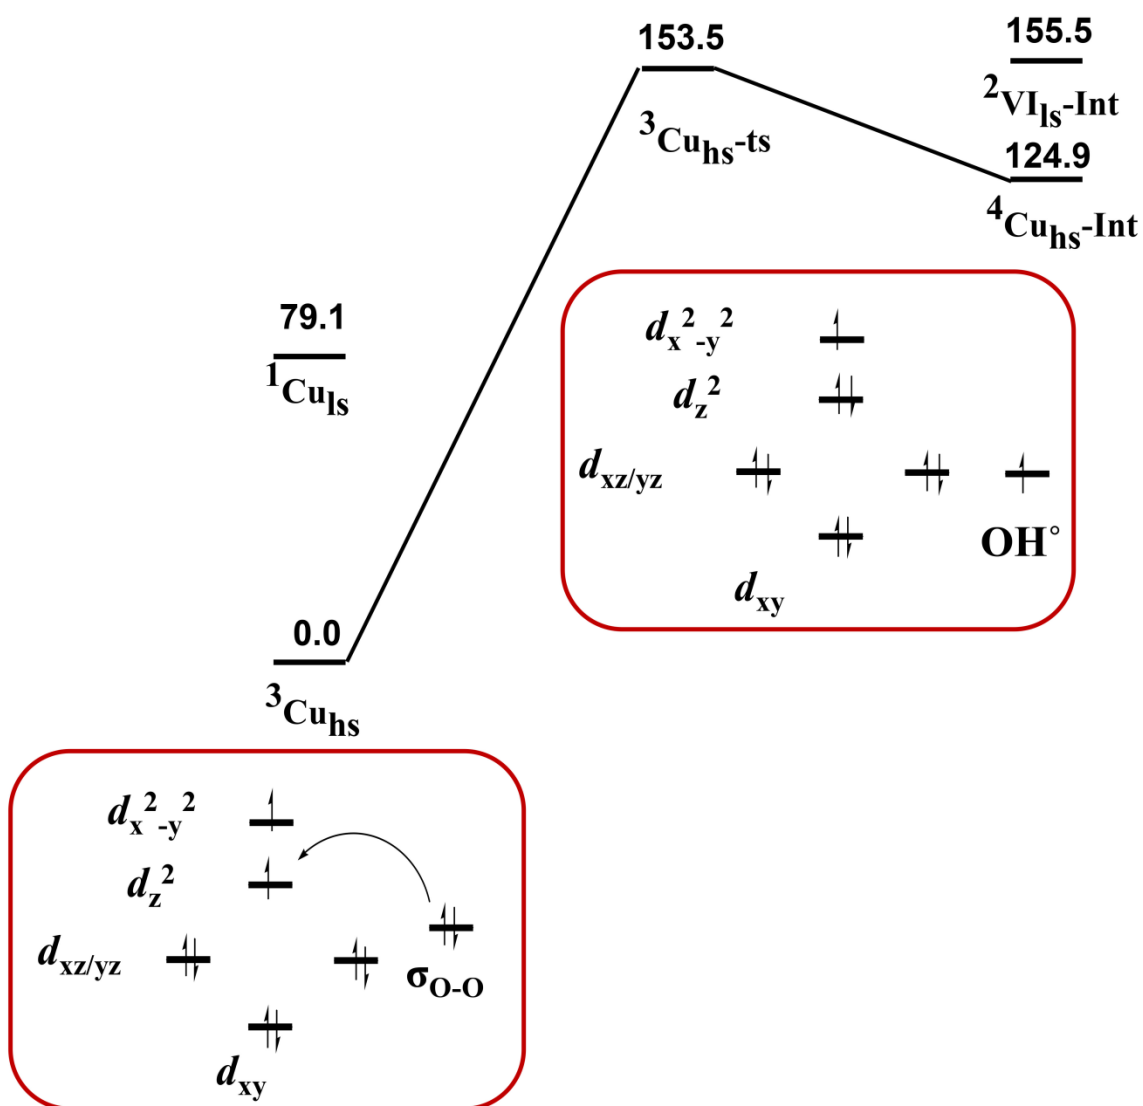

Figure S18. B3LYP-D2 computed energy surface ( $\Delta G$  in  $\text{kJ mol}^{-1}$ ) for the O---O bond cleavage of copper(III) hydroperoxo species.

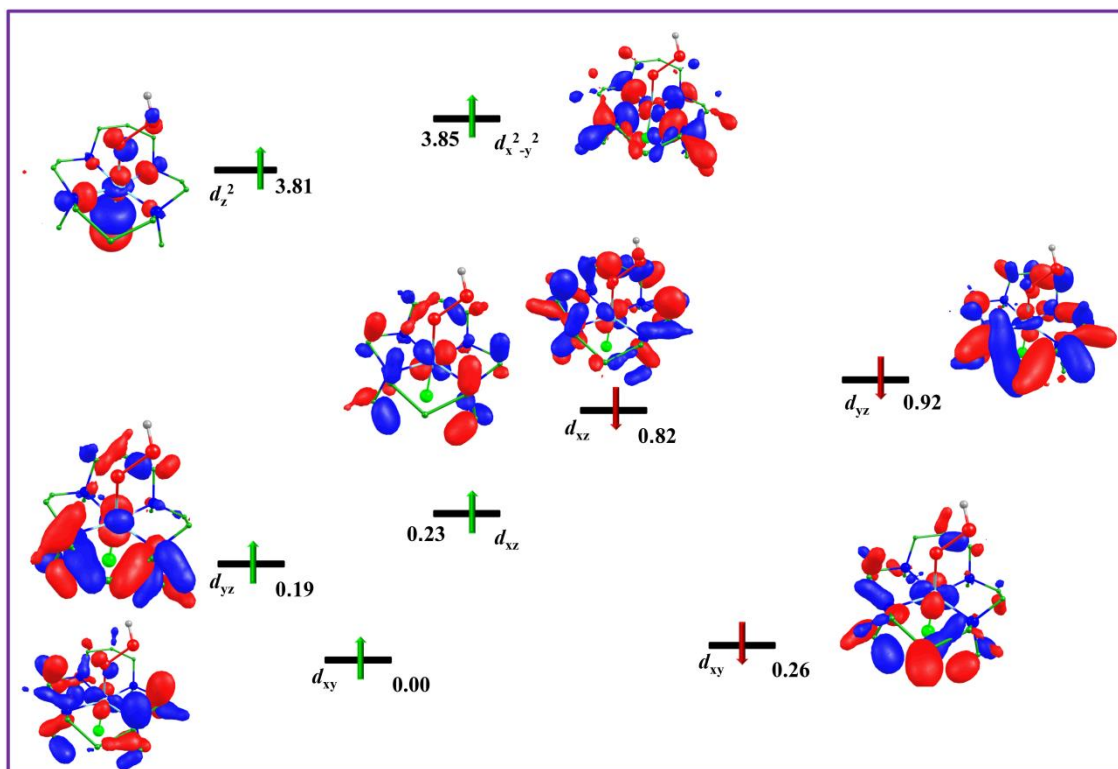

Figure S19. Computed eigenvalue plot incorporating energies computed for  $d$ -based orbitals for alpha and beta spin corresponding to the ground state  $^3\text{Cu}_{\text{hs}}$  of the copper(III) hydroperoxo species (energies are given in eV).

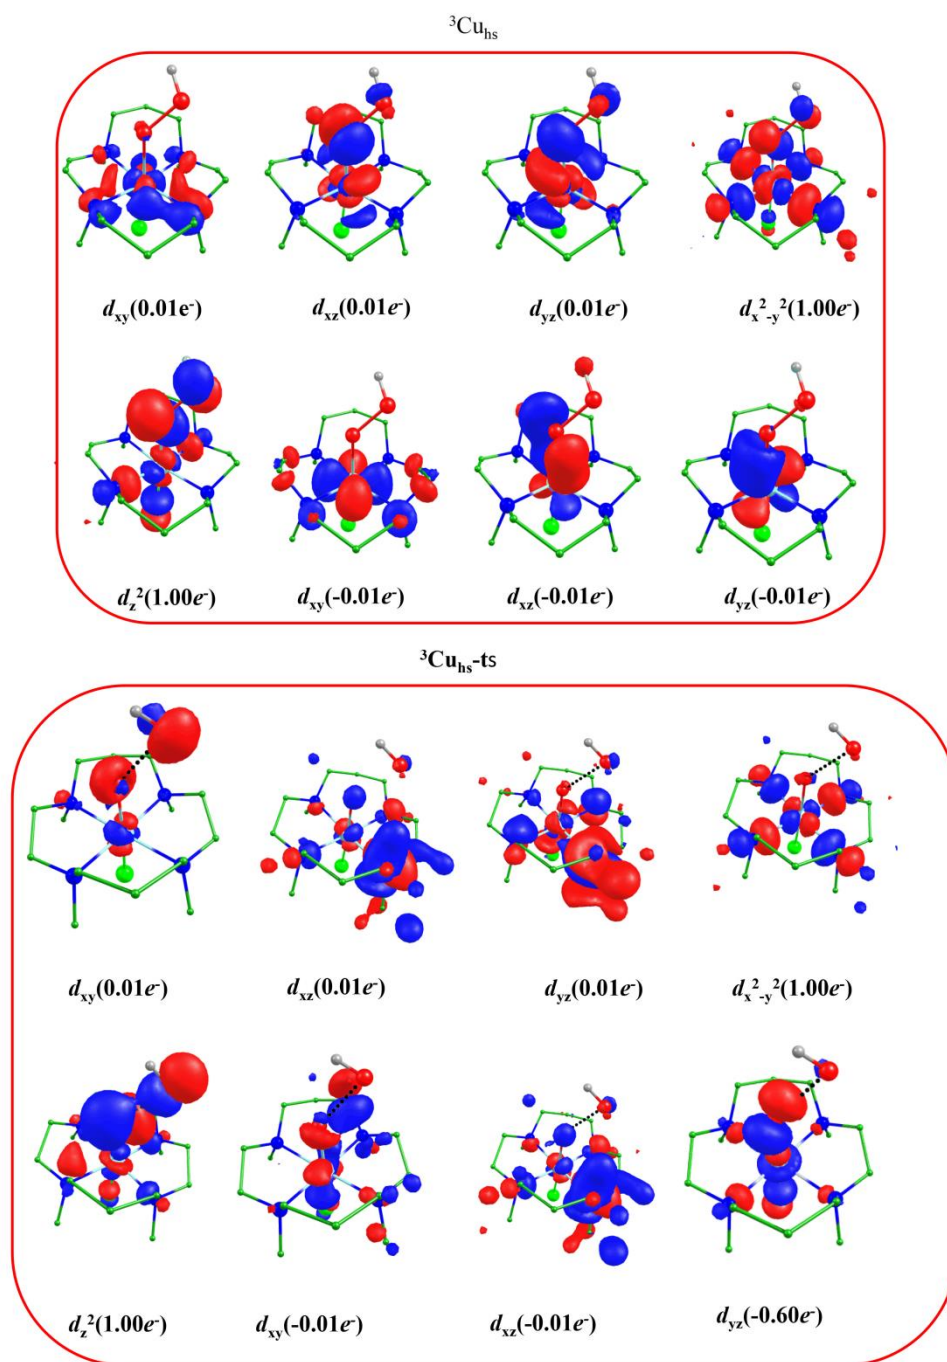

Figure S20. Spin natural orbitals and their occupations (noted in parenthesis) of  ${}^5\text{Cu}_{\text{hs}}$ , and  ${}^5\text{Cu}_{\text{hs}}\text{-ts}$ .

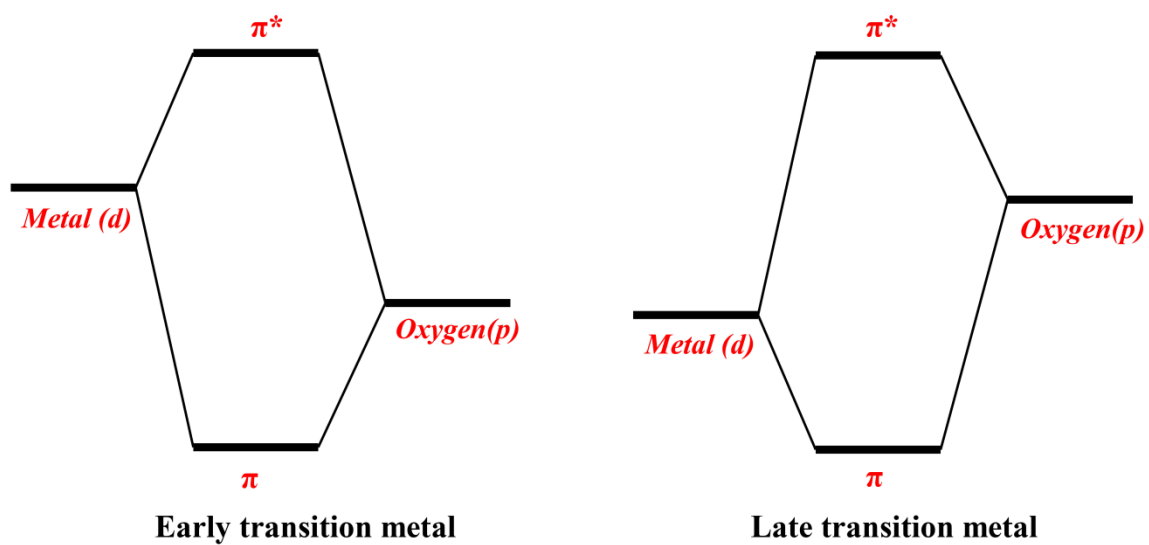

Scheme S2. Pi interaction of the metal  $d$  orbitals with that of the oxygen  $p$  orbitals.

Table S5. Computed stretching frequency of M-O bond in Metal-oxo species

| <b>Metal-oxo</b>                   | <b><math>\nu</math> (cm<sup>-1</sup>)</b> |
|------------------------------------|-------------------------------------------|
| <sup>3</sup> Cr <sub>hs</sub> -Int | 558                                       |
| <sup>4</sup> Mn <sub>hs</sub> -Int | 869                                       |
| <sup>5</sup> Fe <sub>hs</sub> -Int | 872                                       |
| <sup>4</sup> Co <sub>is</sub> -Int | 849                                       |
| <sup>5</sup> Ni <sub>hs</sub> -Int | 499                                       |
| <sup>4</sup> Cu <sub>hs</sub> -Int | 376                                       |

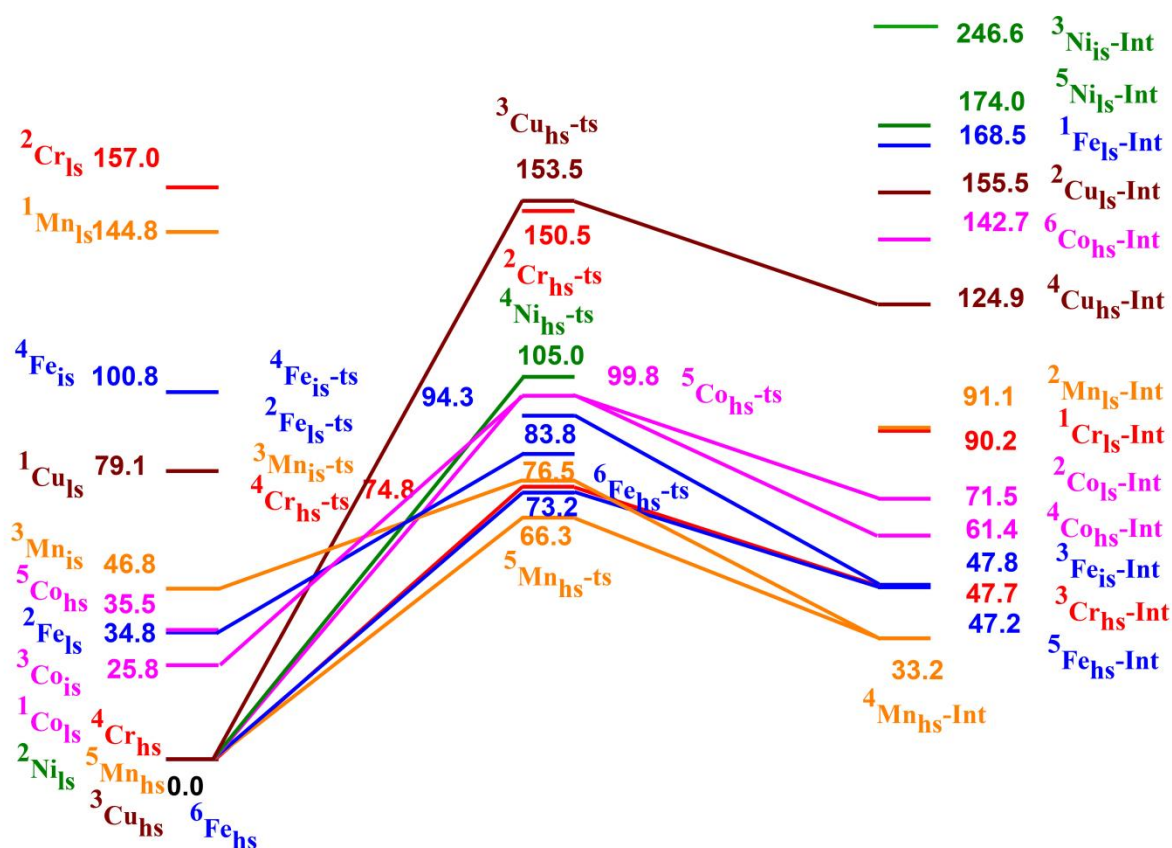

Figure S21. B3LYP-D2 computed energy surface for the formation of metal-oxo from 14-TMC metal hydroperoxo chromium (red), manganese (orange), iron (blue), cobalt (purple), nickel (green), and copper (dark red).

## References

1. J. Cho, J. Woo and W. Nam, *J. Am. Chem. Soc.*, 2012, **134**, 11112-11115.
2. J. U. Rohde, J. H. In, M. H. Lim, W. W. Brennessel, M. R. Bukowski, A. Stubna, E. Münck, W. Nam and L. Que Jr., *Science*, 2003, **299**, 1037-1039.
3. B. Wang, Y. M. Lee, W. Y. Tcho, S. Tussupbayev, S. T. Kim, Y. Kim, M. S. Seo, K. B. Cho, Y. Dede, B. C. Keegan, T. Ogura, S. H. Kim, T. Ohta, M. H. Baik, K. Ray, J. Shearer and W. Nam, *Nat Commun.*, 2017, **8**, 14839-14849.
4. H. Hirao, D Kumar, L. Que, Jr. and S Shaik, *J. Am. Chem. Soc.*, 2006, **128**, 8590-8606.
